# Supplementary material for: Timing of Wnt Inhibition Modulates Directed Differentiation of Medial Ganglionic Eminence Progenitors from Human Pluripotent Stem Cells
Source: Hindawi journal article supplement (doi:10.1155/2018/3983090), 2018-06-27
Supplement: f1 [file 3983090.f1.pdf]

**Table S1. Primer Sequences used for RT-qPCR**

| <b>Gene</b>   | <b>Forward Sequence</b>    | <b>Reverse Sequence</b>    | <b>Reference</b>          |
|---------------|----------------------------|----------------------------|---------------------------|
| <i>FOXG1</i>  | AGAAGAACGGCAAGTACGAGA      | TGTTGAGGGACAGATTGTGGC      | Bissonnette et al., 2011  |
| <i>EN1</i>    | CCCTGGTTTCTCTGGGACTT       | GCAGTCTGTGGGGTCGTATT       | Yan et al., 2005          |
| <i>HOXC6</i>  | CACCGCCTATGATCCAGTGAGGCA   | GCTGGAACTGAACACGACATTCTC   | Moon et al., 2012         |
| <i>PAX6</i>   | ACCACACCGGTTTCTCCTTCACA    | TTGCCATGGTGAAGCTGGGCAT     | Imaizumi et al., 2015     |
| <i>PAX6</i>   | ACAGATCTACGCCAGCGACT       | CATGGTGTTCGTAGTGGATGC      | Liu et al., 2013          |
| <i>NKX2.1</i> | CGCATCCAATCTCAAGGAAT       | CAGAGTGTGCCAGAGTGAA        | Liu et al., 2013          |
| <i>LHX8</i>   | CCAAAACCAGCAAAAAGAGC       | TGGCGTGTCTACAATTCTG        | Liu et al., 2013          |
| <i>LHX6</i>   | ACAGATCTACGCCAGCGACT       | CATGGTGTTCGTAGTGGATGC      | Liu et al., 2013          |
| <i>GSX2</i>   | AGGAGAGAAGGGGACTCAGC       | CGGACACTGACATCACCAAC       | Vergano-Vera et al., 2009 |
| <i>MEIS2</i>  | GACCACGATGATGCAACC         | CCTGTGTCTTGCCTAACTG        | Zha Y et al., 2014        |
| <i>SOX2</i>   | ACACCAATCCCATCCACT         | GCAAACCTCCTGCAAAGCTC       | Sundberg et al., 2011     |
| <i>MAP2</i>   | AATAGACCTAAGCCATGTGACATCC  | AGAACCAACTTTAGCTTGGGCC     | Muratore et al., 2014     |
| <i>SHH</i>    | GAG TCT CTG CAC TAC GAG GG | CGA GTT CTC TGC TTT CAC CG |                           |

**Table S2. Anti-human antibodies used for immunocytochemistry**

| <b>Antibody</b>   | <b>Species</b> | <b>Supplier</b>           | <b>Dilution</b> |
|-------------------|----------------|---------------------------|-----------------|
| $\alpha$ - SOX2   | Rabbit         | Cell Signaling Technology | 1:400           |
| $\alpha$ - NESTIN | Mouse          | Millipore                 | 1:1000          |
| $\alpha$ - FOXG1  | Rabbit         | Abcam                     | 1:1000          |
| $\alpha$ - MAP2   | Mouse          | R&D Systems               | 1:250           |
| $\alpha$ - NKX2.1 | Rabbit         | Abcam                     | 1:250           |
| $\alpha$ - PAX6   | Sheep          | R&D Systems               | 1:200           |

**Table S3. Comparison of the relative gene expression ( $\Delta$ CT) in MGE generated in the RD, AdD, and the NAdD strategies**

| Differentiation protocol | RD                |       | AdD               |       | NAdD              |       | Gene   |
|--------------------------|-------------------|-------|-------------------|-------|-------------------|-------|--------|
| Treatment                | Relative quantity | SE    | Relative quantity | SE    | Relative quantity | SE    |        |
| NT                       | 0.898             | 0.036 | 0.674             | 0.026 | 0.661             | 0.036 | GAPDH  |
| Baseline *               | 0.757             | 0.097 | 0.816             | 0.056 | 0.814             | 0.248 |        |
| Stage 1                  | 0.498             | 0.049 | 0.502             | 0.044 | 0.461             | 0.133 |        |
| Stage 2                  | 0.642             | 0.043 | 0.888             | 0.047 | 0.798             | 0.053 |        |
| NT                       | 0.960             | 0.132 | 0.161             | 0.070 | 0.040             | 0.003 | FOXP1  |
| Baseline                 | 0.561             | 0.193 | 0.276             | 0.085 | 0.050             | 0.005 |        |
| Stage 1                  | 0.496             | 0.038 | 0.361             | 0.013 | 0.925             | 0.087 |        |
| Stage 2                  | 0.579             | 0.018 | 0.409             | 0.120 | 0.482             | 0.093 |        |
| NT                       | 0.108             | 0.002 | 0.115             | 0.016 | 0.114             | 0.002 | EN1    |
| Baseline                 | 0.029             | 0.004 | 0.249             | 0.043 | 0.139             | 0.009 |        |
| Stage 1                  | 0.010             | 0.001 | 0.373             | 0.061 | 0.230             | 0.010 |        |
| Stage 2                  | 0.029             | 0.022 | 0.063             | 0.008 | 0.054             | 0.006 |        |
| NT                       | 0.016             | 0.004 | 0.021             | 0.002 | 0.081             | 0.003 | NKX2.1 |
| Baseline                 | 0.200             | 0.012 | 0.232             | 0.051 | 0.322             | 0.005 |        |
| Stage 1                  | 0.960             | 0.084 | 0.202             | 0.013 | 0.667             | 0.047 |        |
| Stage 2                  | 0.304             | 0.033 | 0.340             | 0.023 | 0.306             | 0.023 |        |
| NT                       | 0.009             | 0.004 | 0.037             | 0.004 | 0.017             | 0.013 | LHX8   |
| Baseline                 | 0.046             | 0.012 | 0.236             | 0.044 | 0.051             | 0.004 |        |
| Stage 1                  | 0.913             | 0.084 | 0.044             | 0.013 | 0.915             | 0.092 |        |
| Stage 2                  | 0.228             | 0.033 | 0.333             | 0.023 | 0.374             | 0.013 |        |
| NT                       | 0.033             | 0.016 | 0.031             | 0.004 | 0.165             | 0.023 | LHX6   |
| Baseline                 | 0.276             | 0.008 | 0.249             | 0.044 | 0.051             | 0.004 |        |
| Stage 1                  | 0.014             | 0.006 | 0.214             | 0.033 | 0.038             | 0.009 |        |
| Stage 2                  | 0.278             | 0.025 | 0.681             | 0.073 | 0.244             | 0.023 |        |
| NT                       | 0.403             | 0.009 | 0.308             | 0.048 | 0.382             | 0.063 | PAX6   |
| Baseline                 | 0.311             | 0.043 | 0.256             | 0.003 | 0.266             | 0.040 |        |
| Stage 1                  | 0.068             | 0.018 | 0.217             | 0.013 | 0.138             | 0.010 |        |
| Stage 2                  | 0.085             | 0.030 | 0.139             | 0.013 | 0.209             | 0.034 |        |
| NT                       | 0.092             | 0.018 | 0.257             | 0.066 | 0.496             | 0.043 | GSX2   |
| Baseline                 | 0.518             | 0.061 | 0.486             | 0.034 | 0.026             | 0.005 |        |
| Stage 1                  | 0.013             | 0.014 | 0.093             | 0.011 | 0.256             | 0.015 |        |
| Stage 2                  | 0.202             | 0.025 | 0.183             | 0.009 | 0.163             | 0.024 |        |
| NT                       | 0.113             | 0.002 | 0.104             | 0.023 | 0.029             | 0.002 | MEIS2  |
| Baseline                 | 0.016             | 0.001 | 0.162             | 0.005 | 0.109             | 0.003 |        |
| Stage 1                  | 0.007             | 0.001 | 0.278             | 0.025 | 0.021             | 0.001 |        |
| Stage 2                  | 0.092             | 0.018 | 0.126             | 0.019 | 0.086             | 0.003 |        |
| NT                       | 0.903             | 0.094 | 0.685             | 0.101 | 0.504             | 0.015 | MAP2   |
| Baseline                 | 0.794             | 0.058 | 0.765             | 0.051 | 0.664             | 0.056 |        |
| Stage 1                  | 0.558             | 0.120 | 0.604             | 0.033 | 0.314             | 0.026 |        |
| Stage 2                  | 0.574             | 0.022 | 0.808             | 0.040 | 0.502             | 0.027 |        |
| NT                       | 0.683             | 0.016 | 0.685             | 0.101 | 0.660             | 0.139 | SOX2   |
| Baseline                 | 0.794             | 0.080 | 0.705             | 0.096 | 0.891             | 0.014 |        |
| Stage 1                  | 0.498             | 0.062 | 0.534             | 0.006 | 0.416             | 0.024 |        |
| Stage 2                  | 0.574             | 0.041 | 0.728             | 0.040 | 0.753             | 0.116 |        |

\* Baseline in the RD and the AdD protocols represents treatment with SHH alone

\* Baseline in the NAdD protocol represents treatment with SB431542

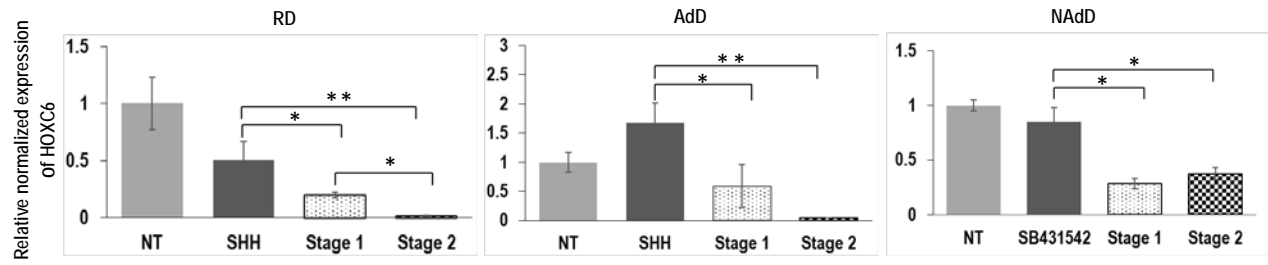

**Supplementary figure S1.** Quantitative RT-PCR analysis of a hindbrain marker HOXC6 (expression relative to non-treated cells, NT = 1) in NPC generated in the RD, AdD, and NAdD protocols. Data are presented as mean  $\pm$  SEM. \* P < 0.05 and \*\* P < 0.001 difference between treatment with Shh alone (in the RD and AdD protocols) or SB431542 alone, (in the NAdD protocol)] and Wnt inhibition supplemented during NSC stage (Stage 1) or NPC stage (Stage 2).

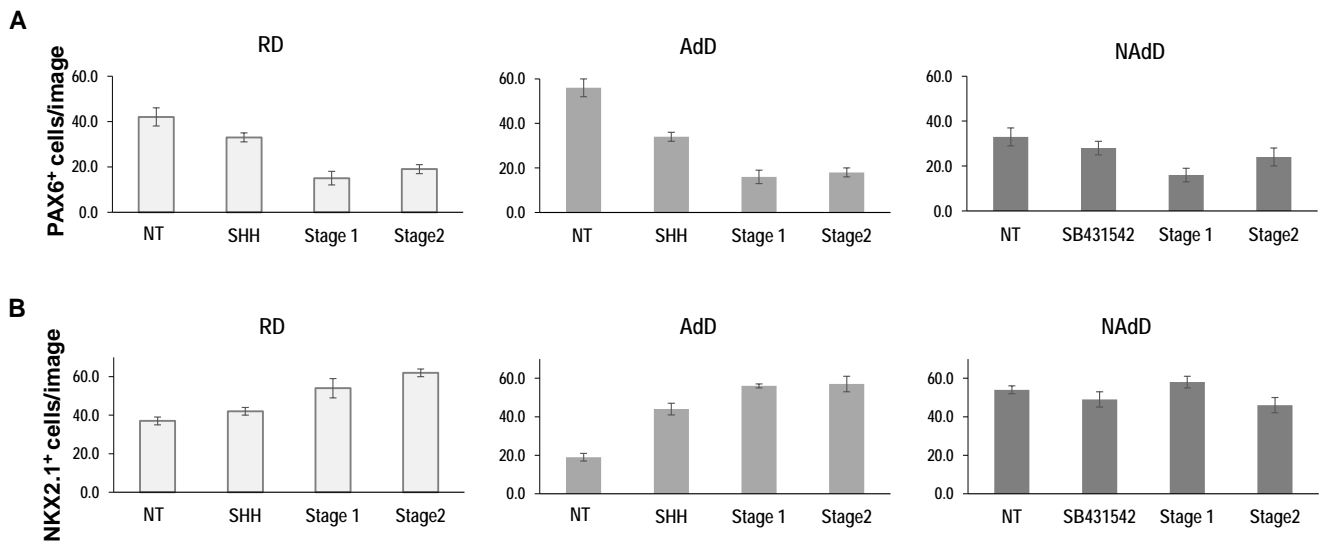

**Supplementary Figure S2. Wnt inhibition changes expression of dorsal (PAX6) and ventral (NKX2.1) forebrain progenitors in the three differentiation protocols.** Decrease in number of PAX6<sup>+</sup> cells (**A**) and increase in number of NKX2.1<sup>+</sup> cells (**B**) in NPC treated with SHH and/or SB431542 alone and in combination with IWP-2 during NSC (Stage 1) and NPC (Stage 2) stages of neural differentiation. Data are presented as mean $\pm$ SD.

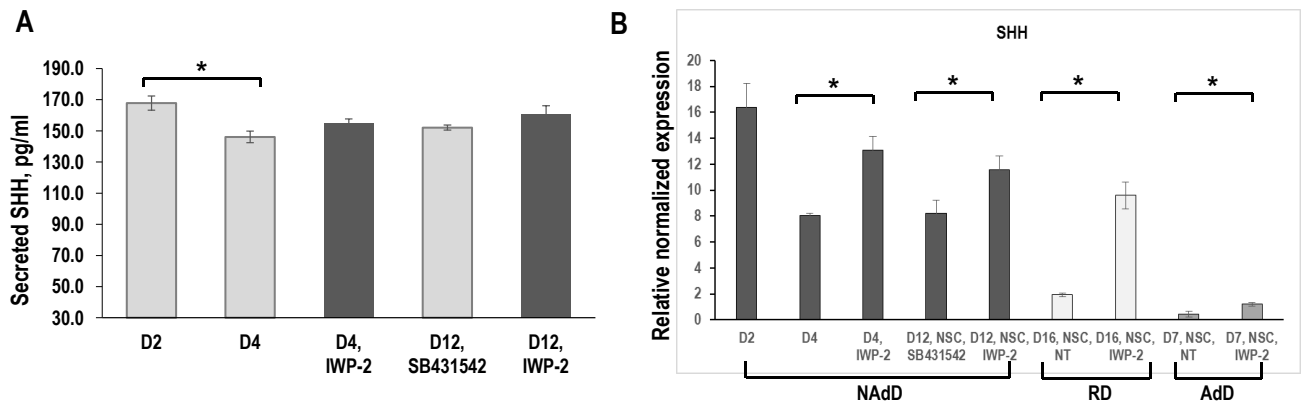

**Supplementary Figure S3. The level of SHH during neuronal induction/neuroepithelia generation.**

**A** - The level of SHH in culture media at D2, D4, and D12 secreted by the cells undergoing NAAd differentiation with or without Wnt inhibition. Significant decrease in the level of SHH between D2 and D4 is observed in the samples without IWP-2. Wnt inhibition is needed to sustain SHH level.

**B** - *SHH* gene expression during neuroepithelia generation and at the stage of NSC in the three differentiation strategies. The highest level of *SHH* is detected in the NAAd protocol. The expression of *SHH* is higher in all protocols in the presence of IWP-2.
